# Supplementary material for: Abrogation of pathogenic attributes in drug resistant Candida auris strains by farnesol
Source: PubMed Central journal article supplement (PMC7213696; doi:10.1371/journal.pone.0233102), 2020-05-11
Supplement: pone.0233102.s001.pdf [file pone.0233102.s001.pdf]

# PLOS ONE

## Abrogation of pathogenic attributes in drug resistant *Candida auris* strains by farnesol --Manuscript Draft--

|                                                                                                                                                                                                                                                                                          |                                                                                                                                                                                                                                                                                                                                                                                                                                                                                                                                                                                                                                                                                                                                                                                                                                                                                                                                                                                                                                                                                                                                                                                                                                                                                                                                                                                                                                                                                                                                                                                                                                                                                                                |
|------------------------------------------------------------------------------------------------------------------------------------------------------------------------------------------------------------------------------------------------------------------------------------------|----------------------------------------------------------------------------------------------------------------------------------------------------------------------------------------------------------------------------------------------------------------------------------------------------------------------------------------------------------------------------------------------------------------------------------------------------------------------------------------------------------------------------------------------------------------------------------------------------------------------------------------------------------------------------------------------------------------------------------------------------------------------------------------------------------------------------------------------------------------------------------------------------------------------------------------------------------------------------------------------------------------------------------------------------------------------------------------------------------------------------------------------------------------------------------------------------------------------------------------------------------------------------------------------------------------------------------------------------------------------------------------------------------------------------------------------------------------------------------------------------------------------------------------------------------------------------------------------------------------------------------------------------------------------------------------------------------------|
| <b>Manuscript Number:</b>                                                                                                                                                                                                                                                                | PONE-D-19-35054                                                                                                                                                                                                                                                                                                                                                                                                                                                                                                                                                                                                                                                                                                                                                                                                                                                                                                                                                                                                                                                                                                                                                                                                                                                                                                                                                                                                                                                                                                                                                                                                                                                                                                |
| <b>Article Type:</b>                                                                                                                                                                                                                                                                     | Research Article                                                                                                                                                                                                                                                                                                                                                                                                                                                                                                                                                                                                                                                                                                                                                                                                                                                                                                                                                                                                                                                                                                                                                                                                                                                                                                                                                                                                                                                                                                                                                                                                                                                                                               |
| <b>Full Title:</b>                                                                                                                                                                                                                                                                       | Abrogation of pathogenic attributes in drug resistant <i>Candida auris</i> strains by farnesol                                                                                                                                                                                                                                                                                                                                                                                                                                                                                                                                                                                                                                                                                                                                                                                                                                                                                                                                                                                                                                                                                                                                                                                                                                                                                                                                                                                                                                                                                                                                                                                                                 |
| <b>Short Title:</b>                                                                                                                                                                                                                                                                      | Farnesol inhibits pathogenicity markers in <i>C. auris</i>                                                                                                                                                                                                                                                                                                                                                                                                                                                                                                                                                                                                                                                                                                                                                                                                                                                                                                                                                                                                                                                                                                                                                                                                                                                                                                                                                                                                                                                                                                                                                                                                                                                     |
| <b>Corresponding Author:</b>                                                                                                                                                                                                                                                             | Aijaz Ahmad, Ph.D.<br>University of the Witwatersrand<br>Johannesburg, Gauteng SOUTH AFRICA                                                                                                                                                                                                                                                                                                                                                                                                                                                                                                                                                                                                                                                                                                                                                                                                                                                                                                                                                                                                                                                                                                                                                                                                                                                                                                                                                                                                                                                                                                                                                                                                                    |
| <b>Keywords:</b>                                                                                                                                                                                                                                                                         | <i>C. auris</i> ; farnesol; biofilm; efflux pump; pathogenicity markers                                                                                                                                                                                                                                                                                                                                                                                                                                                                                                                                                                                                                                                                                                                                                                                                                                                                                                                                                                                                                                                                                                                                                                                                                                                                                                                                                                                                                                                                                                                                                                                                                                        |
| <b>Abstract:</b>                                                                                                                                                                                                                                                                         | <p><i>Candida auris</i>, a decade old <i>Candida</i> species, has been identified globally as a significant nosocomial multidrug resistant (MDR) pathogen responsible for causing invasive outbreaks. Biofilms and overexpression of efflux pumps such as Major Facilitator Superfamily and ATP Binding Cassette are known to cause multidrug resistance in <i>Candida</i> species, including <i>C. auris</i>. Therefore, targeting these factors may prove an effective approach to combat MDR in <i>C. auris</i>. In this study, 25 clinical isolates of <i>C. auris</i> from different hospitals of South Africa were used. All the isolates were found capable enough to form biofilms on 96-well microtiter plate that was further confirmed by MTT reduction assay. In addition, these strains have active drug efflux mechanism which was supported by rhodamine-6-G extracellular efflux and intracellular accumulation assays. Antifungal susceptibility profile of all the isolates against commonly used drugs was determined following CLSI recommended guidelines. We further studied the role of farnesol, an endogenous quorum sensing molecule, in modulating development of biofilms and drug efflux in <i>C. auris</i>. The MIC for planktonic cells ranged from 62.5-125 mM and for sessile cells was 125 mM (0 h and 4 h biofilm) and 500 mM (12 h and 24 h biofilm). Farnesol inhibited biofilm formation, blocked efflux pumps and downregulated biofilm- and efflux pump-associated genes. Modulation of <i>C. auris</i> biofilm formation and efflux pump activity by farnesol represent a promising approach for controlling life threatening infections caused by this pathogen.</p> |
| <b>Order of Authors:</b>                                                                                                                                                                                                                                                                 | Vartika Srivastava<br>Aijaz Ahmad, Ph.D.                                                                                                                                                                                                                                                                                                                                                                                                                                                                                                                                                                                                                                                                                                                                                                                                                                                                                                                                                                                                                                                                                                                                                                                                                                                                                                                                                                                                                                                                                                                                                                                                                                                                       |
| <b>Additional Information:</b>                                                                                                                                                                                                                                                           |                                                                                                                                                                                                                                                                                                                                                                                                                                                                                                                                                                                                                                                                                                                                                                                                                                                                                                                                                                                                                                                                                                                                                                                                                                                                                                                                                                                                                                                                                                                                                                                                                                                                                                                |
| <b>Question</b>                                                                                                                                                                                                                                                                          | <b>Response</b>                                                                                                                                                                                                                                                                                                                                                                                                                                                                                                                                                                                                                                                                                                                                                                                                                                                                                                                                                                                                                                                                                                                                                                                                                                                                                                                                                                                                                                                                                                                                                                                                                                                                                                |
| <b>Financial Disclosure</b>                                                                                                                                                                                                                                                              | AA acknowledges financial support from National Research Foundation Research Development Grant for Y-Rated Researchers (RDYR180418322304; Grant No: 116339).                                                                                                                                                                                                                                                                                                                                                                                                                                                                                                                                                                                                                                                                                                                                                                                                                                                                                                                                                                                                                                                                                                                                                                                                                                                                                                                                                                                                                                                                                                                                                   |
| Enter a financial disclosure statement that describes the sources of funding for the work included in this submission. Review the <a href="#">submission guidelines</a> for detailed requirements. View published research articles from <a href="#">PLOS ONE</a> for specific examples. | VS is thankful to Health Sciences Faculty Research Committee, University of the Witwatersrand for the financial support (FRC, Grant no: 001254846410151211050000000000000005254).                                                                                                                                                                                                                                                                                                                                                                                                                                                                                                                                                                                                                                                                                                                                                                                                                                                                                                                                                                                                                                                                                                                                                                                                                                                                                                                                                                                                                                                                                                                              |
| This statement is required for submission and <b>will appear in the published article</b> if the submission is accepted. Please make sure it is accurate.                                                                                                                                |                                                                                                                                                                                                                                                                                                                                                                                                                                                                                                                                                                                                                                                                                                                                                                                                                                                                                                                                                                                                                                                                                                                                                                                                                                                                                                                                                                                                                                                                                                                                                                                                                                                                                                                |

**Unfunded studies**

Enter: *The author(s) received no specific funding for this work.*

**Funded studies**

Enter a statement with the following details:

- Initials of the authors who received each award
- Grant numbers awarded to each author
- The full name of each funder
- URL of each funder website
- Did the sponsors or funders play any role in the study design, data collection and analysis, decision to publish, or preparation of the manuscript?
- **NO** - Include this sentence at the end of your statement: *The funders had no role in study design, data collection and analysis, decision to publish, or preparation of the manuscript.*
- **YES** - Specify the role(s) played.

\* typeset

**Competing Interests**

Use the instructions below to enter a competing interest statement for this submission. On behalf of all authors, disclose any [competing interests](#) that could be perceived to bias this work—acknowledging all financial support and any other relevant financial or non-financial competing interests.

This statement **will appear in the published article** if the submission is accepted. Please make sure it is accurate. View published research articles from [PLOS ONE](#) for specific examples.

The authors have declared that no competing interests exist.

**NO authors have competing interests**

Enter: *The authors have declared that no competing interests exist.*

**Authors with competing interests**

Enter competing interest details beginning with this statement:

*I have read the journal's policy and the authors of this manuscript have the following competing interests: [insert competing interests here]*

\* typeset

**Ethics Statement**

Enter an ethics statement for this submission. This statement is required if the study involved:

- Human participants
- Human specimens or tissue
- Vertebrate animals or cephalopods
- Vertebrate embryos or tissues
- Field research

Write "N/A" if the submission does not require an ethics statement.

General guidance is provided below.

Consult the [submission guidelines](#) for detailed instructions. **Make sure that all information entered here is included in the Methods section of the manuscript.**

All the *Candida auris* isolates were collected with an approval by the Human Research Ethics Committee of University of the Witwatersrand (M140159) and performed according to guidelines outlined in the Helsinki Declaration.

**Format for specific study types**

**Human Subject Research (involving human participants and/or tissue)**

- Give the name of the institutional review board or ethics committee that approved the study
- Include the approval number and/or a statement indicating approval of this research
- Indicate the form of consent obtained (written/oral) or the reason that consent was not obtained (e.g. the data were analyzed anonymously)

**Animal Research (involving vertebrate animals, embryos or tissues)**

- Provide the name of the Institutional Animal Care and Use Committee (IACUC) or other relevant ethics board that reviewed the study protocol, and indicate whether they approved this research or granted a formal waiver of ethical approval
- Include an approval number if one was obtained
- If the study involved *non-human primates*, add *additional details* about animal welfare and steps taken to ameliorate suffering
- If anesthesia, euthanasia, or any kind of animal sacrifice is part of the study, include briefly which substances and/or methods were applied

**Field Research**

Include the following details if this study involves the collection of plant, animal, or other materials from a natural setting:

- Field permit number
- Name of the institution or relevant body that granted permission

**Data Availability**

Authors are required to make all data underlying the findings described fully available, without restriction, and from the time of publication. PLOS allows rare exceptions to address legal and ethical concerns. See the [PLOS Data Policy](#) and [FAQ](#) for detailed information.

Yes - all data are fully available without restriction

A Data Availability Statement describing where the data can be found is required at submission. Your answers to this question constitute the Data Availability Statement and **will be published in the article**, if accepted.

**Important:** Stating 'data available on request from the author' is not sufficient. If your data are only available upon request, select 'No' for the first question and explain your exceptional situation in the text box.

Do the authors confirm that all data underlying the findings described in their manuscript are fully available without restriction?

**Describe where the data may be found in full sentences. If you are copying our sample text, replace any instances of XXX with the appropriate details.**

- If the data are **held or will be held in a public repository**, include URLs, accession numbers or DOIs. If this information will only be available after acceptance, indicate this by ticking the box below. For example: *All XXX files are available from the XXX database (accession number(s) XXX, XXX).*
- If the data are all contained **within the manuscript and/or Supporting Information files**, enter the following: *All relevant data are within the manuscript and its Supporting Information files.*
- If neither of these applies but you are able to provide **details of access elsewhere**, with or without limitations, please do so. For example:

*Data cannot be shared publicly because of [XXX]. Data are available from the XXX Institutional Data Access / Ethics Committee (contact via XXX) for researchers who meet the criteria for access to confidential data.*

*The data underlying the results presented in the study are available from (include the name of the third party*

All relevant data are within the manuscript

|                                                                                                                                                                                                                                         |  |
|-----------------------------------------------------------------------------------------------------------------------------------------------------------------------------------------------------------------------------------------|--|
| <p><i>and contact information or URL).</i></p> <ul style="list-style-type: none"><li>• This text is appropriate if the data are owned by a third party and authors do not have permission to share the data.</li></ul> <p>* typeset</p> |  |
| Additional data availability information:                                                                                                                                                                                               |  |



21 **Abstract**

22 *Candida auris*, a decade old *Candida* species, has been identified globally as a significant  
23 nosocomial multidrug resistant (MDR) pathogen responsible for causing invasive outbreaks.  
24 Biofilms and overexpression of efflux pumps such as Major Facilitator Superfamily and ATP  
25 Binding Cassette are known to cause multidrug resistance in *Candida* species, including *C. auris*.  
26 Therefore, targeting these factors may prove an effective approach to combat MDR in *C. auris*.  
27 In this study, 25 clinical isolates of *C. auris* from different hospitals of South Africa were used.  
28 All the isolates were found capable enough to form biofilms on 96-well microtiter plate that was  
29 further confirmed by MTT reduction assay. In addition, these strains have active drug efflux  
30 mechanism which was supported by rhodamine-6-G extracellular efflux and intracellular  
31 accumulation assays. Antifungal susceptibility profile of all the isolates against commonly used  
32 drugs was determined following CLSI recommended guidelines. We further studied the role of  
33 farnesol, an endogenous quorum sensing molecule, in modulating development of biofilms and  
34 drug efflux in *C. auris*. The MIC for planktonic cells ranged from 62.5-125 mM and for sessile  
35 cells was 125 mM (0 h and 4 h biofilm) and 500 mM (12 h and 24 h biofilm). Farnesol inhibited  
36 biofilm formation, blocked efflux pumps and downregulated biofilm- and efflux pump-  
37 associated genes. Modulation of *C. auris* biofilm formation and efflux pump activity by farnesol  
38 represent a promising approach for controlling life threatening infections caused by this  
39 pathogen.

40 **Keywords:** *C. auris*; farnesol; biofilm; efflux pump; pathogenicity markers

41

42



43 **Introduction**

44 *Candida auris* has now well evolved MDR pathogen, which has caused serious outbreaks in  
45 several continents. It was first isolated from external ear of a Japanese patient in 2009 [1] and  
46 within a decade infection caused by *C. auris* has spread rapidly across six continents [1, 2].  
47 Centers for Disease Control and Prevention (CDC) has declared *C. auris* as a global threat with a  
48 report of causing several outbreaks in different countries, including United States  
49 (<https://www.cdc.gov/fungal/candida-auris/tracking-c-auris.html>). *C. auris* is causing serious  
50 bloodstream infections and other infections ranging from meningitis, bone infections, surgical  
51 wound infections and urinary tract infections have been reported in hospitals [3]. *C. auris*  
52 infections are stubborn because it is resilient to the available antifungal drugs including  
53 fluconazole (first-line antifungal drug) and amphotericin B. In one of the reports, CDC has  
54 analyzed antifungal susceptibility profile of different *C. auris* isolates and it was reported that  
55 almost all the isolates were resistant to azoles (fluconazole) and 1/3 of isolates remain unaffected  
56 to ~~polyenes~~ (amphotericin B). In 2016, Infectious Diseases Society of America (IDSA) Clinical  
57 Practice Guidelines for Candidiasis has recommended Antifungal susceptibility testing (AFST)  
58 for all clinically-relevant *Candida* isolates. Furthermore, it was suggested that any *Candida*  
59 isolate with antifungal resistance  $\geq 1$  and with uncertain identity should be further tested for  
60 confirmation of *C. auris* [4]. In a study, out of 54 *C. auris* isolates from five countries, (FLZ) <sup>introduced!</sup>  
61 resistance was reported in 93% isolates, (AmB) <sup>introduce</sup> resistance in 35% isolates, and echinocandins  
62 resistance in 7% *C. auris* isolates (around 41 % *C. auris* isolates were found resistant to  $\geq 2$   
63 antimycotic class of drugs) [5]. Similarly, a recent report clears scenario of *C. auris* resistance in  
64 the U.S., 86%, 43% and 3% of first 35 patients were resistant to fluconazole, amphotericin B,  
65 and echinocandins respectively [6].

which guideline?  
not echinocandins.

IF Fluco-res  
≠ pan-azole  
3  
use abbreviations.

66 Whereas, echinocandins class of drugs was found active against most of the isolates of *C. auris*;  
67 however, echinocandin resistance in patients have been reported recently [7]. Researchers have  
68 reported multidrug resistance among *C. auris* isolates as a common phenomenon, severely  
69 restraining its treatment possibilities [5]. In South Africa, the first instance of infection caused  
70 by *C. auris* was reported in the 2014 and around 1,700 cases were detected between 2012 and  
71 2016. Currently, *C. auris* is a widespread problem as it is found in almost 100 hospitals across  
72 South Africa with a vast majority of cases been reported in Gauteng [8]. why?

73 Increasing prevalence of *C. auris* infection worldwide especially in South Africa motivated us to  
74 study pathogenic traits of this species. Farnesol, a first quorum sensing (QS) molecule identified  
75 in eukaryotic microorganisms [9], play an important role in an array of biological functions such  
76 as virulence, biofilm formation, and competence [10]. Numerous studies have reported the effect  
77 of farnesol on *C. albicans* growth and pathogenesis [11-13]. In *C. albicans*, farnesol inhibits the  
78 dimorphism [9] that prevent its establishment in different environmental conditions [14], it has  
79 antioxidant effects [15] and it inhibits transporters [16]. Additionally, farnesol showed low  
80 cytotoxicity without genotoxic effects [17]. With this background, we emphasized to study the  
81 effect of farnesol on growth, biofilms and reversal of drug resistance in different *C. auris*  
82 isolates.

## 83 **Methods**

### 84 ***Candida* isolates**

85 In this study, ~~16 isolates of *Candida* spp. including~~ 25 *C. auris* and 1 *C. albicans* (SC5314) were  
86 used (Table 1). All the 25 clinical *C. auris* strains were obtained from the Division of Mycology,  
87 National Institute of Communicable Diseases, Johannesburg, South Africa. All ~~these~~ isolates

88 were collected with an approval by the Human Research Ethics Committee of University of the  
 89 Witwatersrand (M140159) and performed according to guidelines outlined in the Helsinki  
 90 Declaration. Identification was performed using Matrix-assisted laser desorption/ionization time-  
 91 of-flight (MALDI-TOF) technique. The isolates were stored in glycerol stock at -80 °C until  
 92 required.

→ which machine?  
 which database?

93 **Table 1: List of *Candida* isolates**

| <i>Candida</i> spp. isolates used in study |                           |
|--------------------------------------------|---------------------------|
| <i>C. auris</i> MRL 6326                   | <i>C. auris</i> MRL 3499  |
| <i>C. auris</i> MRL 6183                   | <i>C. auris</i> MRL 6194  |
| <i>C. auris</i> MRL 4888                   | <i>C. auris</i> MRL 6005  |
| <i>C. auris</i> MRL 6015                   | <i>C. auris</i> MRL 6057  |
| <i>C. auris</i> MRL 6333                   | <i>C. auris</i> MRL 5762  |
| <i>C. auris</i> MRL 4587                   | <i>C. auris</i> MRL 6173  |
| <i>C. auris</i> MRL 6334                   | <i>C. auris</i> MRL 5765  |
| <i>C. auris</i> MRL 3785                   | <i>C. auris</i> MRL 2397  |
| <i>C. auris</i> MRL 6059                   | <i>C. auris</i> MRL 5418  |
| <i>C. auris</i> MRL 4000                   | <i>C. auris</i> MRL 6277  |
| <i>C. auris</i> MRL 6065                   | <i>C. auris</i> MRL 6339  |
| <i>C. auris</i> MRL 2921                   | <i>C. albicans</i> SC5314 |
| <i>C. auris</i> MRL 6125                   |                           |
| <i>C. auris</i> MRL 6338                   |                           |

place in  
 numerical  
 order in  
 text.

← already  
 mentioned

94

95 **Antifungal susceptibility profiles**

amb-fungal

specific type of plates???

96 The susceptibility profile of *C. auris* isolates were established by broth microdilution assay as  
 97 per the recommended guidelines of Clinical and Laboratory Standards Institute (CLSI) reference  
 98 document M27-A3 [18]. Briefly, stock solution of AmB was prepared by using 1% dimethyl  
 99 sulfoxide (DMSO) and the range of concentration tested was 16 – 0.031 µg/ml. Similarly, FLZ  
 100 stock solution was prepared using deionized water and the range of concentration tested ranged  
 101 from 1000 – 1.0 µg/ml. Farnesol stock solution was prepared with 1% DMSO and the  
 102 concentration tested ranged from 250 – 0.48 mM. The drugs and farnesol at desired  
 103 concentrations (100 µl) were introduced in designated wells of 96-well microtiter plate  
 104 containing 100 µl of *C. auris* cell suspension ( $5.0 \times 10^6$  CFU/ml). These plates were incubated at  
 105 ~~37~~<sup>How determined</sup> °C for 48 h without shaking. In every set of experiment, cell free (sterility) and drug free  
 106 (growth) controls were included for each *C. auris* isolates and all the isolates were tested in  
 107 triplicate. *C. albicans* SC5314 was kept as a standard laboratory control in each test performed.  
 108 Observation was made visually as well as by employing 3-(4,5-Dimethyl-2-thiazolyl)-2,5-  
 109 diphenyl-2H-tetrazolium bromide (MTT) reduction assay [19]. Briefly, a stock solution of MTT  
 110 in Phosphate Buffer Saline (PBS) (5 mg/ml, filter sterilized and diluted 1:5 with pre-warmed  
 111 sterile PBS). After ~~48~~<sup>X</sup> h incubation, 50 µl of MTT solution was added to each well of the  
 112 microtiter plate and was incubated for 5 h at 37 °C. Subsequently, 100 µl of DMSO was added to  
 113 solubilize the MTT-formazan product, which was measured at 490 nm by using a microplate  
 114 reader (iMark, BioRad). The MICs were defined as the lowest concentration of AmB farnesol  
 115 that resulted in the complete inhibition of growth whereas ~~80~~<sup>X</sup> % inhibition was considered in  
 116 case of FLZ.

117 ***Candida auris* biofilm formation**

why MTT and not the better XTT test?

butler refer to a study that used it for fungi. Understand self-citations...

118 Biofilm formation by *Candida* spp. on medical devices is very common problem and life  
119 threatening for patients. Different clades of *C. auris* have also been reported to produce biofilm  
120 and therefore we studied the biofilm forming capability of South African clade *C. auris* isolates.  
121 The method adapted to evaluate biofilm formation by *C. auris* isolates has been described  
122 previously [19]. The metabolic activity of *C. auris* biofilm was also compared with *C. albicans*  
123 SC5314 biofilms. The metabolic activity was also compared among *C. auris* isolates and those  
124 with higher readings were selected for further investigation (drug efflux and accumulation  
125 studies as well as for molecular analysis).

this does not exclude the existence of "other-clade" *C. auris*!

#### 126 **Effect of farnesol on development of *C. auris* biofilms**

127 To evaluate the activity of farnesol on sessile cells of *C. auris* and later development of biofilms,  
128 a method described previously was followed [19]. Briefly, 100  $\mu$ l standardized cell suspensions How?  
129 ( $5.0 \times 10^6$  CFU/ml) were inoculated into predetermined wells of 96-well microtiter plates  
130 followed by incubation at 37 °C for 0, and 4 h. After incubation the growth medium was  
131 removed followed by thorough washing with sterile PBS. After removal of non-adherent cells,  
132 different concentrations (500 mM to 0.488 mM) of farnesol were added to the wells of microtiter  
133 plate. To check the effect of farnesol on adherence and biofilm formation, farnesol and  
134 standardized suspension were added together to microtiter plate (zero time/preincubation) and  
135 incubated for 48 h. Furthermore, to see the effect on 4 h mature biofilms, cells were incubated  
136 under biofilm forming conditions for 4 h and then sessile cells were removed, washed gently  
137 with sterile PBS and farnesol was added to predetermine wells and incubated for 48 h. Metabolic  
138 activities of the biofilms were measured using MTT reduction assay. Briefly, a stock solution of  
139 MTT (as described in section 2.2) was prepared. After biofilm formation, 50  $\mu$ l of MTT solution  
140 was added to each well of the 96-well microtiter plate and was incubated for 5 h at 37 °C.

7  
e

141 Subsequently, MTT was removed and 100  $\mu$ l of DMSO was added to solubilize the MTT-  
142 formazan product, which was measured at 490 nm by using a microplate reader (iMark, BioRad).

what kind of measurement?  
point or radial?

### 143 **Effect of farnesol on mature biofilms**

144 *C. auris* biofilms were allowed to grow for 12 and 24 h at 37 °C under favorable biofilm forming  
145 conditions. The growth medium was removed, and biofilm was washed gently with sterile PBS.  
146 Farnesol (500  $\mu$ M to 0.488  $\mu$ M) was added to the predefined wells of microtiter plates and  
147 further incubated for 24 h at 37 °C. The metabolic activity of treated and untreated biofilms was  
148 assessed by MTT reduction assay (as described in section 2.4). The lowest concentration of  
149 farnesol where we reported  $\geq$  ~~90~~% destruction in mature biofilm was recorded. Furthermore,  
150 biofilm inhibitory concentrations (BIC) were defined as the lowest concentration of farnesol  
151 where we report inhibition ( $\geq$  ~~90~~%) compared to the growth control.

### 152 **Confocal laser scanning microscopy (CLSM)**

153 To further confirm the effect of farnesol on *C. auris* biofilm, CLSM was done. *C. auris* strain  
154 MRL 5765 was allowed to grow on glass coverslips in 6-well microtiter plates under biofilm  
155 forming conditions. Farnesol (BIC) was administered in designated wells at different time points  
156 (4 h, 12 h and 24 h) except the growth control wells (untreated cells). The plates were further  
157 incubated for 24 h at ~~37~~ °C. Following incubation, the planktonic cells were aspirated and  
158 biofilms were gently washed twice with PBS and stained with fluorescent dye FUN-1  
159 (Invitrogen, Thermo Fisher Scientific, ZA) and concanavalin A (ConA)-Alexa Fluor 488  
160 conjugate (Invitrogen, Thermo Fisher Scientific, ZA). For staining, the coverslips were  
161 transferred to a new 6-well microtiter plate and incubated with 2 ml PBS containing FUN-1 (10  
162  $\mu$ M) and ConA-Alexa Fluor 488 conjugate (25  $\mu$ g/ml) for 45 min at 37 °C in dark. FUN-1

163 (excitation ~~wavelength~~ = 543 nm and emission ~~wavelength~~ = 560 nm) is a vital dye and only live  
164 cells are capable of transporting it to the vacuole and result into orange-red cylindrical intra-  
165 vacuolar structures (CIVS) whereas in dead cells FUN-1 remain in the cytosol and fluoresces  
166 yellow-green [20]. ConA (excitation ~~wavelength~~ = 488 nm and emission ~~wavelength~~ = 505 nm)  
167 on the other hand fluoresces bright green when binds to  $\alpha$ -mannopyranosyl and  $\alpha$ -glucopyranosyl  
168 residues present in cell wall and biofilm matrix. After incubation with fluorescent dyes the glass  
169 coverslips were flipped on glass plates and stained biofilms were observed using a Zeiss Laser  
170 Scanning Confocal Microscope (LSM) 780 and Airyscan (Carl Zeiss, ~~Inc.~~). Multitrack mode was  
171 used to collect the images of green (ConA) and red (FUN-1) fluorescence simultaneously. The  
172 thickness or volume of whole biofilm was determined by collecting Z-stack picture and the  
173 distances between first and last fluorescent confocal plane was defined as biofilm thickness [21].

#### 174 Extracellular Rhodamine 6G efflux assay

175 Extracellular efflux of Rhodamine 6G (R6G) from *C. auris* cells were evaluated as described  
176 previously [22] with some minor adjustments. For this study four *C. auris* isolates (MRL 4000,  
177 MRL 5765, MRL 5762, and MRL 6057) were selected and *C. albicans* SC5314 was used as  
178 standard for efflux activity. Briefly, *Candida* cells were grown on Sabouraud Dextrose Agar  
179 (SDA) plates for 24 h at 37~~°~~C. The cells ( $5.0 \times 10^6$  CFU/ml) were inoculated in 50 ml growth  
180 media (SDB) for 8 h at 37~~°~~C. Post incubation media was centrifuged (3000 rpm), washed with  
181 25 ml PBS (without glucose) at least two times. The washed cells were resuspended in sterile  
182 glucose-free PBS (2% cell suspension). The cells were further incubated in 50 ml PBS  
183 containing 2-deoxy-<sup>small capital</sup>D-glucose (5.0 mM) and 2,4 dinitrophenol (5.0 mM) for 45 min, resulting in  
184 de-energizing of cells. Followed by de-energization the cells were washed and again resuspended  
185 in glucose-free PBS (2% cell suspension), R6G (final concentration of 10  $\mu$ M) was added to this

how selected?  
on which growth?

How?

what is that?  
how many cells?

How many cells?

186 resuspension and incubated for 40 min at 37 °C. After incubation cells were again washed and  
187 resuspended in glucose-free PBS (2% cell suspension). Samples (2 ml) were withdrawn at  
188 definite intervals (0, 5, 10, 15, 20 min). After harvesting samples were pelleted at 3,000 rpm and  
189 optical density of supernatant was recorded at 527 nm. To study the energy dependent R6G  
190 efflux, glucose (0.1 M) was added after 20 min incubation to the cells resuspended in glucose-  
191 free PBS. The absorbance was recorded till 60 min of incubation with glucose and the last  
192 reading was recorded after overnight (20 h; 1200 min) incubation. Positive as well as negative  
193 controls were included in all the experiments. The standard concentration curve of R6G was  
194 prepared for determining the actual concentration of R6G effluxed.

195 For competition assays, yeast cells were exposed for 2 h to different concentration of farnesol  
196 (0.5 × MIC and MIC). Post exposure the cells were pelleted (3000 rpm) and washed twice with  
197 sterile PBS (without glucose). Thereafter treated cells were de-energized and then equilibrated in  
198 R6G as stated above. Samples (2 ml) were withdrawn at predetermined time points (0, 5, 10, 15,  
199 20 min), centrifuged (3,000 rpm) and absorbance of supernatant was recorded at 527 nm. The  
200 estimation of energy dependent R6G efflux was done by adding glucose (0.1 M) after 20 min  
201 incubation to the resuspended cells and reading were recorded till 60 min and last reading was  
202 recorded after 1200 min of incubation. Positive as well as negative controls were included in all  
203 the experiments. The standard concentration curve of R6G was prepared for determining the  
204 actual concentration of R6G effluxed.

### 205 Intracellular Rhodamine 6G accumulation assay

206 Intracellular accumulation assay was executed as discussed earlier with minor modifications  
207 [22]. Briefly, *C. auris* isolates (MRL 6057, MRL 4000, MRL 5762, and MRL 5765) cells were

20h.  
no min = exact!

What are the  
"minor" modifications?



208 grown overnight in SDB medium at 37°C. After incubation cells were centrifuged and washed  
209 twice in sterile PBS and re-inoculated in sterile SDB broth supplemented with farnesol (at 0.5 ×  
210 MIC and MIC) for 2 h at 37°C. Post incubation, cells were pelleted (3000 rpm) and given sterile  
211 PBS wash. The washed cells ( $5.0 \times 10^6$  CFU/ml) were resuspended in sterile PBS (1.0 ml)  
212 supplemented with glucose (2%) and R6G (4 µM) and then incubated for 30 min at 37°C. Post  
213 incubation cells were washed twice with cold sterile PBS and the pellet was used for  
214 fluorescence microscopy.

### 215 Real Time PCR

216 The mRNA expression level for CDR1, CDR2, SNQ2, HYR3, IFF4, PGA7, PGA26, PGA52,  
217 MDR1, MDR2 and ACT1 (housekeeping gene) were measured using RT-qPCR. The method was  
218 taken from previous study described elsewhere [23]. Briefly, *C. auris* isolates (MRL 6057, MRL  
219 4000, MRL 5762 and MRL 5765) were incubated overnight at 37 °C SDB medium. Overnight  
220 cultures were centrifuged (3000 rpm) resulting a pellet, which was resuspended in sterile SDB  
221 broth (10 ml) containing farnesol (MIC) and then incubated at 37°C for 2 h. After exposure time  
222 centrifugation (3000 rpm) was done, supernatant was discarded and pellet was used for RNA  
223 extraction. RNA was extracted by using RNA MiniPrep kit (Inqaba Biotechnical Industries (Pty)  
224 Ltd) as instructed by the manufacturer. The NanoDrop 2000 spectrophotometer (Thermo  
225 Scientific) was used to determine concentrations of isolated RNAs. Purity of RNAs was assessed  
226 by determining  $A_{260}/A_{280}$  ratio and a ratio above 2 was used for further experiment (qRT-PCR).  
227 cDNA was synthesized using Lasec SA (Pty) Ltd cDNA kit following manufacturer's  
228 instructions. PCR master mix and PowerUp SYBR Green Master Mix (Applied Biosystems)  
229 were used to amplify *C. auris* genes from cDNA by LightCycler Nano Real-Time PCR system  
230 (Roche). **Table 2** enlists the primers (both forward and reverse) used for amplification and

only these are used in ref 23!

provide info!  
otherwise exclude = non-reproducible

RT-qPCR

231 experimental conditions were as follows: UDG activation at 50 °C for 2 min (Hold), Dual-lock  
 232 DNA polymerase at 95 °C for 2 min (Hold), 40 cycles of denaturation at 95°C for 15 sec,  
 233 annealing at 53 °C for 15 sec, and extension 72 °C for 1 min. Dissociation curve conditions (melt  
 234 curve stage) were as follows: Pre-melting at ramp rate of 1.6 °C/sec, 95 °C and 15 sec; Melting  
 235 at ramp rate of 1.6 °C/sec, 60 °C and 1 min; Melting at ramp rate of 0.15 °C/sec, 95 °C and 15  
 236 sec. The dissociation curve and CT values were determined using the Light Cycler Nano system.  
 237 The gene expression was quantified and analyzed with respect to the housekeeping gene *ACT1*  
 238 using formula  $2^{-\Delta\Delta CT}$ . The relative change in expression was estimated by normalizing to  
 239 housekeeping gene (*ACT1*).

240 **Table 2: Nucleotide sequences for primers (5'—3')**

| Gene          | Forward primer         | Reverse primer       |
|---------------|------------------------|----------------------|
| * <i>CDR1</i> | GAAATCTTGCACTTCCAGCCC  | CATCAAGCAAGTAGCCACCG |
| * <i>MDR1</i> | GAAGTATGATGGCGGGTG     | CCCAAGAGAGACGAGCCC   |
| <i>SNQ2</i>   | ATCACCGAGGAATTGAGCAC   | TCAACCTGTGAGCTTGATGC |
| <i>HYR3</i>   | CTGGTTTGACCTTCGTGGAT   | GGCAGAGGTGACGTAGAAGC |
| <i>IFF4</i>   | AATGGTGCTGGTTGTGTGAA   | AGTGAACCCAAGGTTGATGC |
| <i>PGA26</i>  | CCACGAACCTCCAAACAAGT   | TGGTCACTGTGAGGGTGGTA |
| <i>PGA7</i>   | GGCAGACTTTTCAGCTTTGG   | AATCAATTTCCCGTTTGCAG |
| <i>PGA52</i>  | ACGAACACACCGTTGAATGA   | AGTGCCATCTTGAGCGCTAT |
| * <i>ACT1</i> | GAAGGAGATCACTGCTTTAGCC | GAGCCACCAATCCACACAG  |
| * <i>CDR2</i> | GTCAACGGTAGCTGTGTG     | GTCCCTCCACCGAGTATGG  |
| * <i>MDR2</i> | GGCGAGCTGTTGAGAATGTG   | CTTCATGGCTTGCAACCTTC |

---

ALS5

GCGATCCAATTTTGAAGAA

GGTGCATCCCTATCTGAGGA

---

241 \*Primers for the gene, *CDR1*, *CDR2*, *MDR1*, *MDR2* and *ACT1* were obtained from Rybak *et al.*, 2019  
242 [23]. Whereas, other primer sequences were designed by online Primer3web version 4.1.0.

### 243 **Statistics**

244 All the data and graphs were made and statistically analyzed using GraphPad prism version 5.01.  
245 All the experiments were carried out in triplicates, and the data obtained were presented as  
246 means  $\pm$  standard error of the mean. Two-way ANOVA was used to compare untreated control  
247 with treated groups and P value less than 0.05 was considered significant.

### 248 **Results and Discussion**

#### 249 **Antifungal susceptibility testing**

250 All the clinical isolates of *C. auris* used in the present study were found sensitive to the farnesol  
251 within the MIC range of 62.5 - 125 mM. MIC values for AmB ranged from 0.125 - 4.0  $\mu$ g/ml  
252 whereas for FLZ the MIC values ranged from 16 - 500  $\mu$ g/ml (**Table 3**). As there are no  
253 confined cutoff values to differentiate susceptible and resistant *C. auris* isolates against these  
254 drugs, it would have been inappropriate to categorize these isolates. However, CDC has  
255 established arbitrary breakpoints for *C. auris*, which were set at  $\geq 32$   $\mu$ g/ml and  $\geq 2$   $\mu$ g/ml for  
256 FLZ and AmB, respectively [8, 24]. Based on these cutoff values, all the tested *C. auris* isolates  
257 except three (MRL 3785, MRL 3499, MRL 2397) were FLZ resistant whereas five *C. auris*  
258 isolates (MRL 2921, MRL 4000, MRL 5765, MRL 5762 and MRL 6057) were found resistant to  
259 AmB. Recent studies have also confirmed that *C. auris* isolates are usually resistant or less  
260 susceptible to azoles [25-27]. Furthermore, lower susceptibility of *C. auris* isolates against AmB  
261 is also in agreement with previous studies, where high AmB MICs for *C. auris* isolates was

check!  
this is available  
i believe

262 reported [28-30]. Inhibitory and modulatory effects of farnesol in *C. albicans* and other non-  
 263 *albicans* has already being studied and its impact on biofilm formation, efflux pumps, and other  
 264 virulence attributes is well established [11, 31-33]. However, this study for the first time reported  
 265 inhibitory effect of farnesol on *C. auris* isolates.

266 **Table 3: MIC values for AmB, FLZ and farnesol against isolates of *C. auris*.**

| <i>C. auris</i> isolates | AmB (µg/ml) | Fluconazole (µg/ml) | Farnesol (mM) | <i>C. auris</i> isolates | AmB (µg/ml) | Fluconazole (µg/ml) | Farnesol (mM) |
|--------------------------|-------------|---------------------|---------------|--------------------------|-------------|---------------------|---------------|
| MRL 6326                 | 0.25        | 125                 | 125           | MRL 3499                 | 0.5         | 16                  | 62            |
| MRL 6183                 | 0.25        | 250                 | 125           | MRL 6194                 | 0.25        | 125                 | 125           |
| MRL 4888                 | 1.0         | 500                 | 125           | MRL 6005                 | 1.0         | 500                 | 125           |
| MRL 6015                 | 0.25        | 62                  | 125           | MRL 6057                 | 4.0         | 125                 | 125           |
| MRL 6333                 | 0.5         | 125                 | 125           | MRL 5762                 | 2.0         | 500                 | 125           |
| MRL 4587                 | 0.5         | 32                  | 125           | MRL 6173                 | 0.25        | 32                  | 125           |
| MRL 6334                 | 0.5         | 250                 | 125           | MRL 5765                 | 2.0         | 500                 | 125           |
| MRL 3785                 | 0.125       | 16                  | 62            | MRL 2397                 | 1.0         | 16                  | 125           |
| MRL 6059                 | 0.5         | 125                 | 125           | MRL 5418                 | 0.5         | 500                 | 125           |
| MRL 4000                 | 2.0         | 250                 | 125           | MRL 6277                 | 0.5         | 125                 | 125           |
| MRL 6065                 | 1.0         | 125                 | 125           | MRL 6339                 | 0.5         | 250                 | 125           |
| MRL 2921                 | 2.0         | 250                 | 125           |                          |             |                     |               |
| MRL 6125                 | 0.25        | 62                  | 125           |                          |             |                     |               |
| MRL 6338                 | 0.25        | 125                 | 125           |                          |             |                     |               |

267

numerical order
